24 **ABSTRACT**

25 Burnout, characterized by emotional exhaustion, depersonalization, and a diminished  
26 sense of accomplishment, is a serious problem among healthcare workers. Burnout negatively  
27 impacts provider well-being, patient outcomes, and healthcare systems globally, and is especially  
28 worrisome in settings with a shortage of healthcare workers and resources. The goal of this study  
29 is to explore the experience of burnout in a population of labor and delivery (L&D) providers in  
30 Tanzania. We examined burnout using three data sources. A structured assessment of burnout  
31 was collected at four time points from a sample of 60 L&D providers in six clinics. The same  
32 providers participated in an interactive group activity from which we drew observational data on  
33 burnout prevalence. Finally, we conducted in-depth interviews (IDIs) with a subset of 15  
34 providers to further explore their experience of burnout. At baseline, prior to any introduction to  
35 the concept, 18% of respondents met criteria for burnout. Immediately after a discussion and  
36 activity on burnout, 62% of providers met criteria. One- and three- months later, 29% and 33%  
37 of providers met criteria, respectively. In IDIs, participants saw the lack of understanding of  
38 burnout as the cause for low baseline rates and attributed the subsequent decrease in burnout to  
39 newly acquired coping strategies. The activity helped providers realize they were not alone in  
40 their experience of burnout. High patient load, low staffing, limited resources, and low pay  
41 emerged as contributing factors. Burnout was prevalent among a sample of L&D providers in  
42 northern Tanzania. However, a lack of exposure to the concept of burnout leads to providers  
43 being unaware of the issue as a collective burden. Therefore, burnout remains rarely discussed  
44 and not addressed, thus continuing to impact provider and patient health. Previously validated  
45 burnout measures cannot adequately assess burnout without a discussion of the context.

46

47

48 **INTRODUCTION**

49  
50 The COVID-19 pandemic focused international attention on healthcare provider burnout  
51 (1,2), but it has been a chronic problem in the healthcare setting due to high levels of stress and  
52 emotional intensity associated with the job (3). Provider burnout is characterized by three  
53 components: 1) emotional exhaustion, defined as the feeling of being “used up” and unavailable  
54 emotionally for patients at the end of the workday; 2) depersonalization, or increased callousness  
55 towards patients; and 3) a sense of diminished personal accomplishment, including feelings of  
56 ineffectiveness and lack of value to patient care (3).

57 Rates of burnout are higher among healthcare trainees and professionals compared to  
58 other professions (3,4). Burnout among healthcare personnel negatively impacts provider health  
59 and well-being, contributing to an increased risk of depression (3,5), alcohol misuse (6) and  
60 suicidal ideation (7). Provider burnout also has a significant impact on patient care and the  
61 healthcare system as a whole (3), with data showing a greater rate of medical errors (8),  
62 decreased productivity (9), increased desire to quit the profession (10), and diminished rapport  
63 with patients (11).

64 Burnout in low and middle income countries (LMICs), especially in Sub-Saharan Africa  
65 has been underexplored (12,13) and specific measures to assess provider burnout have not been  
66 validated. A systematic review of burnout among healthcare providers in Africa found that  
67 burnout was associated with a heavy workload, difficult work conditions, inadequate personnel,  
68 and low work satisfaction (12). A survey of burnout among East African nurses found a high rate  
69 of emotional exhaustion and depersonalization (14). In LMICs, the shortage of healthcare  
70 workers puts additional pressure on health systems (15); in Sub-Saharan Africa, nearly one  
71 fourth of the global disease burden is met by only 3% of the global work force (16).

72 Labor and delivery (L&D) wards are particularly high-stress environments, and research  
73 suggests that maternal health staff may be at higher risk of burnout compared to colleagues in  
74 other specialties (17). Given the impact of provider burnout on patient care, this could have  
75 important implications for maternal and child health outcomes.

76 While healthcare provider burnout has been part of the national conversation in the  
77 United States, and particularly among health care providers themselves, in the previous three  
78 years, it has not received the same level of attention in LMICs. The goal of this study was to  
79 comprehensively explore the understanding of burnout in a population of L&D providers in  
80 Tanzania, and how providers experience burnout in their work. We draw on structured  
81 assessment of burnout at four time points, observations during an interactive group activity on  
82 burnout, and semi-structured interviews. The findings shed light on the experience of burnout in  
83 Tanzania and can help provide guidance on measurement and intervention.

84

## 85 **METHODOLOGY**

### 86 **Overview**

87 As part of a larger study, our team engaged with providers, patients and stakeholders to  
88 develop, deliver and evaluate the MAMA simulation and team-based training, focused on  
89 respectful maternity care (RMC) during L&D for women living with HIV (WLHIV) in Tanzania  
90 (18). The 2.5-day training included case-based learning sessions, simulations, and interactive  
91 activities on teamwork and communication, clinical empathy, stigma and bias, and RMC. Further  
92 intervention content has been described elsewhere (18).

93 In developing the intervention, we conducted focus groups with providers and uncovered  
94 that burnout was a possible contributor to suboptimal delivery of RMC and an actionable area for

95 intervention. High workloads and limited staffing in participating clinics led to providers feeling  
96 overworked and exhausted. However, these feelings were rarely discussed among providers.  
97 Therefore, we decided to incorporate assessments of, and content material on, burnout  
98 throughout the training. Data from these focus group discussions will be presented elsewhere.

## 99 **Data Sources**

100 Study participants were 60 L&D providers from six primary care hospitals in the Moshi  
101 (urban) and Rombo (rural) districts of the Kilimanjaro region of northern Tanzania. The sample  
102 size of 60 was based on consultation with the Tanzania Ministry of Health, who felt that ten  
103 providers per clinic would provide adequate intervention coverage while not disrupting clinical  
104 flow. After obtaining written informed consents, participants were assigned a study ID.  
105 Assessments were conducted at four time points: baseline, immediate post, 1 month post, and 3  
106 months post. The participant flow and follow-up rate is visualized **Supplement Table 1**.

107 We assessed burnout through three sources of data: observational data from an interactive  
108 activity during a training session on burnout, structured assessments of burnout through surveys,  
109 and in-depth interviews on burnout.

## 110 **Interactive session**

111 The MAMA training was delivered to providers in November 2022. The curriculum  
112 included one 45-minute session focused specifically on burnout, followed by three sessions on  
113 clinical empathy (45 minutes), bias and stigma (45 minutes), and mindfulness and coping  
114 strategies (30 minutes). During the burnout session, we first defined burnout for participants as a  
115 combination of emotional exhaustion, depersonalization, and diminution of personal  
116 accomplishment, explaining this could present as feelings of emptiness, fatigue, negative or  
117 distant attitudes towards others, feelings of failure, or low self-esteem. We prompted providers to

118 share their thoughts on factors contributing to burnout in their clinical settings and to engage in a  
119 discussion based on their experience. Then, we invited them to participate in an activity in which  
120 they lined-up in the room along a scale from “not burned out at all” to the left to “completely  
121 burned out” to the right to create a visual representation of the prevalence of burnout among this  
122 group of providers.

123 After the activity, we held a discussion of personal strategies to cope with stress in their  
124 high-pressure work environment including mindfulness and clinical empathy skills. These  
125 included deep breathing, body scan, positive affirmations, holding a powerful pose, daily  
126 intentions, stretching, writing down accomplishments, focusing on sensations during small  
127 activities like handwashing, taking a moment to pause and reflect on next steps when possible.  
128 Participants had the chance to practice each one together and we encouraged them to choose one  
129 or two to practice at work.

130 Additionally, the topics burnout, mindfulness and empathy were integrated throughout  
131 the rest of the MAMA trainings, which was designed to support providers’ emotional wellbeing  
132 and help them connect with themselves, their colleagues and patients through teamwork-based  
133 simulations, games, and opportunities for discussion and reflection.

### 134 **Survey Assessment**

135 We assessed provider burnout using a 2-item measure (19) adapted from the Maslach  
136 Burnout Inventory (20), which were translated, back translated, and piloted with team members  
137 and a small group of providers to ensure accurate translation. After giving a written definition of  
138 burnout (Box 1), translated as “msongomoto” in Swahili, the first question asks respondent to  
139 select one of five responses: “1) I enjoy my work. I have no symptoms of burnout”; “2)  
140 Occasionally I am under stress, and I don’t always have as much energy as I once did, but I don’t

141 feel burned out”; “3) I am definitely burning out and have one or more symptoms of burnout,  
142 such as physical and emotional exhaustion”; “4) the symptoms of burnout that I’m experiencing  
143 won’t go away. I think about frustrations at work a lot”; and “5) I feel completely burned out  
144 and often wonder if I can go on. I am at the point where I may need some changes or may need  
145 to seek some sort of help.” This question was scored on a 5-point Likert scale (0-4).

146 The second question asked participants how often they feel they have become more  
147 callous toward patients since taking this job because of burnout. The response was given on a  
148 scale of “Never” to “Every Day” and scored on a 7-point Likert scale (0-6).

149 We used this measure to assess burnout at four timepoints: immediately before the  
150 delivery of the MAMA training, immediately after the burnout session and interactive activity  
151 during the training, then again one- and three-months post-training. Using  $>2$  as the cutoff for  
152 burnout for the first question (on a 0-4 scale) and  $>4$  for the second question (on a 0-6 scale), we  
153 considered providers burned out if they met criteria for burnout in either question and classified  
154 providers categorically as positive or negative for burnout for our analysis (19,21).

155

156 **Box 1:** Definition of burnout given to participants as part of the measure

### 157 **In-depth interviews**

158 To further understand the experience of burnout in their clinical context, we invited a  
159 subset of 15 providers (2-3 from each facility) to further discuss burnout through in-depth  
160 interviews (IDIs) three to four months post training. We selected participants who had actively  
161 participated and shared their opinions and experiences during the MAMA training and were  
162 viewed by the team as “good informants” (22). IDI participants were further selected to ensure  
163 representation of gender, age, and profession. All 15 providers invited to participate in IDIs

164 agreed. IDIs were conducted in Swahili by four research team members. During the IDIs, we  
165 asked providers if they felt that burnout was common among their colleagues and what it looks  
166 like. We asked if burnout was discussed among colleagues, both before and after the training,  
167 and if so, how it is described. We also explored the impact the training had on the way they view  
168 burnout in themselves and among colleagues. Finally, we applied the method of member  
169 checking by presenting interviewees with our preliminary survey data on reported burnout and  
170 asking for their interpretation of the trends between time-points based on their experience. This  
171 was the opportunity to ask them why they thought the reported rates of burnout on the initial  
172 surveys seemed lower than the levels of burnout expressed through conversation and displayed  
173 through the activity.

#### 174 **Data analysis**

175 Survey data were entered into REDCap software and exported to R for data analysis. We  
176 first used summary statistics to describe participant characteristics. We then determined the  
177 proportion of patients meeting criteria for burnout at each timepoint and used a Pearson's Chi  
178 Squared test to assess changes overall and from mid-training to one-month post training. IDIs  
179 were transcribed and translated then exported into NVivo for applied thematic analysis (23). The  
180 data were coded to identify emerging themes across five domains: prevalence of burnout, drivers  
181 of burnout, manifestations of burnout, explanations of low baseline scores, and explanations for  
182 burnout changes over time. The research team met to discuss the codes in order to group and  
183 synthesize concepts using axial coding (23,24). Analysis was iterative throughout the data  
184 collection process to assess for thematic saturation (25), which was determined when no new  
185 themes or information emerged, and themes were felt to adequately describe the domain of  
186 interest.



187 **Ethical considerations**

188           Written informed consent for participation in the MAMA training, completion of surveys  
189 and participation in interviews was obtained from all participants prior to initiation of the study.  
190 All participant information was stored in a locked cabinet and secured database. The study was  
191 approved by the ethical review committees at the University of Utah (Protocol 00143918),  
192 Kilimanjaro Christian Medical Center (Protocol 2056), and National Institute for Medical  
193 Research in Tanzania (Protocol 3853). The trial is registered at [clinicaltrials.gov](https://clinicaltrials.gov)  
194 ([NCT05271903](https://clinicaltrials.gov/ct2/show/study/NCT05271903)).

195

196 **RESULTS**

197 **Sample description**

198           A total of 60 providers completed the interactive activity in two cohorts of thirty  
199 participants. Surveys were completed by sixty at timepoint 1 (pre-training), sixty at timepoint 2  
200 (mid-training), fifty-five at timepoint 3 (one-month post-training), and fifty-nine at timepoint 4  
201 (three-months post-training). Fifteen participants participated in the IDIs. Table 1 describes  
202 baseline characteristics of our sample of participating providers.

203

204

205

206

207

208

209

210 **Table 1:** Description of the sample of L&D providers participating in the MAMA intervention

|                                                                  | <b>MAMA Training participants (n=60)</b> | <b>IDI participants (n = 15)</b> |
|------------------------------------------------------------------|------------------------------------------|----------------------------------|
|                                                                  | <u>n (%)</u>                             | <u>n (%)</u>                     |
| <b>Gender</b>                                                    |                                          |                                  |
| Female                                                           | 29 (48%)                                 | 7 (47%)                          |
| Male                                                             | 31 (52%)                                 | 8 (53%)                          |
| <b>Clinical training</b>                                         |                                          |                                  |
| Nurse midwife                                                    | 40 (66.7%)                               | 9 (60%)                          |
| Clinical officer                                                 | 4 (6.7%)                                 | 1 (7%)                           |
| Medical doctor                                                   | 16 (26.7%)                               | 5 (33%)                          |
| <b>Number of trainings on L&amp;D for WLHIV in the past year</b> |                                          |                                  |
| None                                                             | 46 (77%)                                 | 11 (73%)                         |
| 1 or more                                                        | 14 (23%)                                 | 4 (27%)                          |
|                                                                  | <u>Median (Q1, Q3)</u>                   | <u>Median (Q1, Q3)</u>           |
| <b>Age</b>                                                       | 32 (27, 37)                              | 32 (29, 39)                      |
| <b>Years since clinical training</b>                             | 8 (4, 12)                                | 6 (8, 10)                        |
| <b>Years providing care in L&amp;D</b>                           | 5 (2, 8)                                 | 5 (4, 7)                         |
| <b>Years working at current clinic</b>                           | 5 (1, 9)                                 | 5 (1, 9)                         |

211

212 **Baseline assessment of burnout**

213 In the baseline surveys prior to the training, only 11 providers (18%) met criteria for  
 214 burnout. This came to the attention of the lead trainers who were curious about this number  
 215 given the findings from our pre-training development phase, in which focus groups identified  
 216 high stress, workload, and limited personnel as issues, all of which in the literature are linked to  
 217 high burnout. This observation triggered the training team to make an on-the-spot alternation to  
 218 the curriculum and to take the time to discuss the definition of burnout and explore the topic with  
 219 participants through the interactive activity described below.

220

221



245 **In-depth interviews**

246 The IDIs with 15 L&D providers (refer to Table 1 for a description of the interviewees)  
247 offered additional insight into the experience of burnout in this population and an explanation of  
248 the change in burnout over time. The majority of respondents (14/15) believed that burnout was  
249 widespread in their workplace. Table 2 describes the themes that emerged relating to prevalence  
250 of burnout, drivers of burnout, manifestations of burnout, explanations for low baseline burnout  
251 scores, and explanation of changes in reported burnout over time.

252 **Drivers of burnout:** In discussing drivers of burnout in their clinical setting, respondents  
253 identified workforce shortages and high patient load as the most common contributors, along  
254 with low pay, long working hours, limited resources, and lack of opportunities for professional  
255 growth. Participants spoke about how clinical factors led to an inability to provide quality patient  
256 care. Several participants also discussed home stress and pressure from leadership as contributors  
257 to burnout.

258 **Manifestations of burnout:** When asked how burnout manifests in the clinical setting,  
259 most respondents discussed the impact of burnout on work efficiency and quality. Other  
260 manifestations of burnout that emerged included suboptimal respectful maternity care,  
261 impatience both with colleagues and patients, loss of motivation in one's work, and anger. One  
262 interviewee pointed to an increased number of unnecessary referrals.

263 **Explanation for low baseline scores:** When asked why baseline (pre-activity) burnout  
264 scores might have been low despite experiences of burnout among providers, participants all  
265 responded that this was due to a lack of understanding of the word burnout and unfamiliarity  
266 with the concept. A few interviewees also suggested respondents may have felt reluctant to share

267 at first due to a fear of being the only one experiencing burnout, a feeling they would be  
 268 admitting to low quality work, or a fear of being reported to leadership by the study team.

269 **Explanation of changes in reported burnout over time:** In discussing the impact of the  
 270 training and activity on the providers’ experience of burnout, a majority of respondents said the  
 271 activity enabled providers to recognize burnout as an issue, to realize they were not alone  
 272 experiencing the feelings of burnout, and to normalize burnout as a common issue among their  
 273 colleagues, leading to an increase in burnout levels reported immediately after the training  
 274 activity. The training also generated further discussion around burnout among providers upon  
 275 returning to work, and all interviewees emphasized how useful the coping strategies discussed  
 276 during the training have been in helping them manage their stress. They all attributed the  
 277 decrease in burnout prevalence seen at one- and three-months post training to the impact of the  
 278 training and use of the skills they acquired and practiced there.

| Themes                       | Representative quote                                                                                                                                                                                                                                                                                       |
|------------------------------|------------------------------------------------------------------------------------------------------------------------------------------------------------------------------------------------------------------------------------------------------------------------------------------------------------|
| <b>Prevalence of burnout</b> |                                                                                                                                                                                                                                                                                                            |
| High levels of burnout       | “Burnout is high from the patients themselves, from the working environment, from the leadership.” (Nurse midwife, age 31-35)                                                                                                                                                                              |
| <b>Drivers of burnout</b>    |                                                                                                                                                                                                                                                                                                            |
| Workforce shortages          | “Shortage contributes. [...] The work that should be done by three people is being done by one person.” (Nurse midwife, age 36-40)                                                                                                                                                                         |
| High patient load            | “What causes [burnout] is the environment you are in and the number of patients you serve. [...] Loosing hope among health providers can be caused by having so many duties. [...] We have been serving many people, you are just one person, you work more than your ability.” (Nurse midwife, age 31-35) |
| Long working hours           | “Burnout happens if you are working so much without refreshers, or you get little rest.” (Clinical officer, age 26-30)                                                                                                                                                                                     |
| Low pay                      | “Our level of pay is not satisfactory, and it causes burnout. You have a family, you have the relatives, you have the bills to pay, and you don’t have money and you are supposed to work. I think those are the things that stress us a lot.” (Nurse midwife, age 31-35)                                  |
| Lack of growth opportunities | “Our public servants sometimes they don’t get a raise in their positions – this is a very difficult thing. You find that someone is in the same position for five years without a raise in the position or in the salary. Therefore, things like this are outside the power of the center, but in one way  |

|                                                       |                                                                                                                                                                                                                                                                                                                                                                                                                                                              |
|-------------------------------------------------------|--------------------------------------------------------------------------------------------------------------------------------------------------------------------------------------------------------------------------------------------------------------------------------------------------------------------------------------------------------------------------------------------------------------------------------------------------------------|
|                                                       | (indirectly) it is affecting the effectiveness of work.” (Doctor, age 51-55)                                                                                                                                                                                                                                                                                                                                                                                 |
| Home stress                                           | “There are challenges like the increase in life cost. Everything is expensive and people have debts [...] What do you expect, won’t that person get burnout? [...] Most women are the pillars of their home. She is carrying many responsibilities: home needs, food, children need school fees, mother is sick in the village... so the woman has many things. Patients are not the only reason that makes her feel tired.” (Nurse midwife, age 26-30)      |
| Blame for mistakes                                    | “When death occurs, that’s when it becomes more challenging. [...] There will be a person who will ask you questions as if you did it intentionally. [...] If you find yourself being pointed fingers at it discourages you and you end up coming to work just because you are obliged to.” (Doctor, age 26-30)                                                                                                                                              |
| <b>Manifestations of burnout</b>                      |                                                                                                                                                                                                                                                                                                                                                                                                                                                              |
| Work efficiency and quality                           | “You do not enjoy the work you do, you just do it. You push yourself because you must, and if it was your decision, you would leave it. Once burnout reaches to that point, a person will just go to work and wait for working hours to end. [...] So the quality of service will be low. The mother is affected.” (Nurse midwife, age 31-35)                                                                                                                |
| Suboptimal RMC                                        | “She cannot serve the mother respectively because she is burned out. So when the mother talks to her, she think the mother is disturbing her.” (Nurse midwife, age 36-40)                                                                                                                                                                                                                                                                                    |
| Impatience with colleagues and patients               | “A person might call the nurse, and the nurse answers ‘what do you want, you call too much. [...] She has been working continuously, she did not get time to rest, so she considers that these patients are the one making her tired. [...] Later she answers her fellow staff rudely. You will hear ‘leave me alone, I am tired with this work.’ [...] You might find yourselves quarreling because you are not in a good mood.” (Nurse midwife, age 36-40) |
| Anger                                                 | “It reaches a point where you lose hope, you lose energy, and even when you go back home, you feel angry when someone talks to you.” (Nurse midwife, age 36-40)                                                                                                                                                                                                                                                                                              |
| Loss of motivation                                    | “You will find a person lacking work motivation, the motivation becomes very low that you will find someone coming to work just because they are obliged to it and not because they are happy to come” (Doctor, age 26-30)                                                                                                                                                                                                                                   |
| Unnecessary referrals                                 | “You might even notice that they referred the patient because they did not want to do the work” (Doctor, age 26-30)                                                                                                                                                                                                                                                                                                                                          |
| <b>Explanation of low baseline scores for burnout</b> |                                                                                                                                                                                                                                                                                                                                                                                                                                                              |
| Lack of understanding                                 | “The burnout, people had it and it is not that they acquired it after the activity, but they never knew that it was burnout and therefore, when they found out the meaning of burnout, they admitted that they had it – that is what caused many people to admit having burnout in the end.” (Doctor, age 51-55)                                                                                                                                             |
| Fear of being alone                                   | “Others are afraid to say because he might have been seen as the only one with burnout, so he decided to keep quiet.” (Nurse midwife, age 36-40)                                                                                                                                                                                                                                                                                                             |
| Fear of admitting to                                  | “If someone opens up to everyone that they have burnout that means they are telling you that “my service provision is of low quality.” (Doctor, age                                                                                                                                                                                                                                                                                                          |

|                                                       |                                                                                                                                                                                                                                                                                                                                      |
|-------------------------------------------------------|--------------------------------------------------------------------------------------------------------------------------------------------------------------------------------------------------------------------------------------------------------------------------------------------------------------------------------------|
| low-quality work                                      | 51-55)                                                                                                                                                                                                                                                                                                                               |
| Fear of being reported                                | “We were worried that in this work, you want us to say this and then you report us somewhere that is why we were afraid.” (Nurse midwife, age 31-35)                                                                                                                                                                                 |
| <b>Explanation of the change in burnout over time</b> |                                                                                                                                                                                                                                                                                                                                      |
| Recognition of burnout                                | “A person might just have felt that he had no mood for the work [...] without knowing that is burnout. After the training, people came to know that what we were feeling was burnout itself. [...] So I realized that I truly have burnout.” (Nurse midwife, age 31-35)                                                              |
| Realizing they are not alone                          | “I felt shocked because [...] many people are very burned out since we are working under pressure, so I felt that I was not alone.” (Nurse midwife, age 31-35)                                                                                                                                                                       |
| Normalizing burnout                                   | “I became aware that burnout at work is normal.” (Nurse midwife, age 26-30)                                                                                                                                                                                                                                                          |
| Discussion of burnout among colleagues                | “Almost every day we talk about burnout. [...] When we left the training, others were wondering, ‘what is burnout?’ so, we explained it to them, and they started saying ‘aah I always get it also.’” (Nurse midwife, age 36-40)                                                                                                     |
| Impact of training                                    | “It is not that [burnout] has ended, it has reduced because if you use those techniques of self-releasing from stress, you become a little better, you continue with your work again. But without getting these trainings about what to do when you have stress, others could have surely quite the job.” (Nurse midwife, age 36-40) |

279 **Table 2:** In-depth interview emerging themes

280

281 **DISCUSSION**

282 Burnout among healthcare workers in Sub-Saharan Africa remains underexplored and  
 283 poorly understood. However, its impact on provider wellbeing, patient outcomes and healthcare  
 284 systems is undeniable. In this paper, we present the findings from our study of provider burnout  
 285 among L&D providers in Tanzania, explored through survey assessments, a team activity, and  
 286 in-depth interviews. Results speak to the need for better assessment of burnout for better  
 287 monitoring and evaluation and for identifying intervention approaches to address this issue.

288

289

290 **Measurement of burnout**

291 To understand the burden of burnout, we must first be able to identify and measure it.  
292 And if burnout is not understood, existing measures cannot be reliably applied. The survey we  
293 used was based on a validated two-item measure of burnout (20). However, at baseline before  
294 the training session on burnout, most providers scored low on the burnout scale, with 18%  
295 meeting criteria for burnout, which was not consistent with our clinical observations and  
296 previous focus group discussions with providers. As we began the discussion of burnout during  
297 the training, we realized that most participants had not previously heard of either the term or  
298 concept of burnout, and that it is not a topic commonly discussed in Tanzania. This was  
299 confirmed during our in-depth interviews (IDIs), in which providers all expressed that prior to  
300 the training, burnout was not a concept they were familiar with, despite experiencing the  
301 symptoms of burnout. The use of the activity to define and discuss burnout gave the providers a  
302 “name” for feelings that they were already experiencing.

303 Following the discussion and activity, the participants’ scores on the repeated burnout  
304 scale were significantly higher, with 62% meeting criteria for burnout. When discussing this  
305 change during the IDIs, providers said this rise in reported burnout represented a new  
306 understanding of the term and a recognition of pre-existing symptoms as burnout. This showed  
307 us that the validated burnout measures cannot be implemented in a new setting without first  
308 explaining and discussing burnout. If providers are not familiar with the concept, the survey will  
309 not accurately represent the level of burnout in their clinical setting.

### 310 **Addressing burnout**

311 Providers commonly identified workforce shortages, high patient load, low pay, long  
312 hours, and limited resources as causes of burnout, which are recurring themes in previous  
313 literature on burnout in Sub-Saharan Africa and clearly not modifiable through provider training



314 (12,15) However, one critical beginning step in addressing burnout is enabling providers to  
315 recognize it as an issue. The interactive activity showed that a majority of providers were  
316 experiencing symptoms of burnout, and this helped providers see that they were not alone in  
317 their feelings of exhaustion and depersonalization due to their job, but that this was an  
318 experience shared by many of their colleagues. This was a very important step in recognizing the  
319 issue as collective and systemic. This process demonstrates the importance of identifying  
320 burnout as an issue and encouraging discussion among providers in order for it to be recognized  
321 and addressed. Providers reported during the IDIs that, as a result of this activity, burnout has  
322 become a commonly discussed issue in the workplace. These findings are consistent with  
323 previous research, which has shown that sharing personal experiences with peers reduces  
324 professional isolation (26) and that interventions promoting collegiality, shared experience, and  
325 community among healthcare providers can improve meaning, engagement and empowerment at  
326 work (27).

327         Second, providers need strategies to mitigate the impact of burnout on their wellbeing  
328 and patient care. Through the training, we discussed mindfulness strategies that participants  
329 could implement immediately upon returning to work to help them manage their stress on a day-  
330 to-day basis. During the in-depth interviews, we learned that these coping strategies have had a  
331 large impact on providers' experience of burnout and have created camaraderie as they help each  
332 other implement the various strategies to cope with stress. The survey data one- and three-  
333 months post-training revealed relatively low burnout rates again, at 29% and 33%, respectively,  
334 showing that the impact of the coping methods on reported levels of burnout endures three  
335 months after the training. As expressed by one of our interviewees, while the environment has

336 not changed, these numbers show that training participants now have the tools to manage  
337 burnout and therefore feel less burdened by it daily.

338 Finally, institutional approaches alongside individual strategies are necessary to promote  
339 provider well-being (27). While these individual behavioral coping methods may be helpful in  
340 the short term, broader systems changes are needed to address the core causes of burnout among  
341 providers, requiring structural changes and increased funding of the public healthcare system.

### 342 **Limitations**

343 This study engaged labor and delivery providers across a range of clinical settings (public  
344 and faith-based) in one region of Tanzania, making the results generalizable to a range of settings  
345 in Tanzania and perhaps beyond. The results, however, must be interpreted in the light of the  
346 study limitations. One limitation is the length of the quantitative burnout assessment. While the  
347 two-item measure has been validated previously (19), it remains a more limited evaluation of  
348 burnout compared to the full 22-item Maslach Burnout Inventory. However, the ability to rapidly  
349 administer the survey was necessary in our setting, enabling us to collect data at four time points,  
350 and the two-item measure holds a balanced part within our mixed methods. One major limitation  
351 is the absence of a comparison condition to conclusively evaluate the impact of the intervention  
352 on provider burnout. However, the IDIs enabled us to get a deeper understanding of the training  
353 impact and pointed to an improvement in provider burnout as a result of the training content.  
354 Finally, due to the small sample size, we were not able to stratify data by demographics or  
355 professional characteristics.

356

357

358

359 **CONCLUSION**

360 Burnout is a global issue with harmful impacts on healthcare provider health, patient  
361 outcomes, and health system function. In low-resource settings, burnout is exacerbated by  
362 workforce shortages, high patient loads, and limited resources. Yet the prevalence and impact of  
363 burnout among healthcare providers in SSA has rarely been studied. This study sheds light on the  
364 experience of burnout in Tanzania and can help provide guidance on future assessments of  
365 burnout and interventions in this setting. Increasing awareness of the issue is crucial to enable  
366 providers to recognize burnout, and further investment in individual and system-wide strategies  
367 to reduce burnout are needed.

368

369 **Funding:** This research is funded by the Fogarty International Center in the U.S. National  
370 Institutes of Health (R21 TW012001). Virginie Marchand is funded by a training award from the  
371 Office of AIDS Research and Fogarty International Center in the U.S. National Institutes of  
372 Health (D43 TW010543).

373

374 **Acknowledgements:** We are grateful for the support of the Kilimanjaro Regional Medical  
375 Office, the leadership of participating clinics, and all participating providers for their time, input,  
376 and the quality of care they provide to their patients.

377

378

379

380

381

## 382 REFERENCES

- 383 1. Chutiyami M, Cheong AMY, Salihu D, Bello UM, Ndwiga D, Maharaj R, et al. COVID-19  
384 Pandemic and Overall Mental Health of Healthcare Professionals Globally: A Meta-Review  
385 of Systematic Reviews. *Front Psychiatry*. 2022 Jan 17;12:804525.
- 386 2. Meira-Silva VST, Freire ACTN, Zinezzi DP, Ribeiro FCR, Coutinho GD, Lima IMB, et al.  
387 Burnout syndrome in healthcare workers during the COVID-19 pandemic: a systematic  
388 review. *Rev Bras Med Trab*. 20(1):122–31.
- 389 3. West CP, Dyrbye LN, Shanafelt TD. Physician burnout: contributors, consequences and  
390 solutions. *J Intern Med*. 2018;283(6):516–29.
- 391 4. Dyrbye LN, West CP, Satele D, Boone S, Tan L, Sloan J, et al. Burnout Among U.S.  
392 Medical Students, Residents, and Early Career Physicians Relative to the General U.S.  
393 Population. *Acad Med*. 2014 Mar;89(3):443.
- 394 5. Bianchi R, Schonfeld IS, Laurent E. Burnout–depression overlap: A review. *Clin Psychol*  
395 *Rev*. 2015 Mar 1;36:28–41.
- 396 6. Oreskovich MR, Kaups KL, Balch CM, Hanks JB, Satele D, Sloan J, et al. Prevalence of  
397 alcohol use disorders among American surgeons. *Arch Surg Chic Ill 1960*. 2012  
398 Feb;147(2):168–74.
- 399 7. van der Heijden F, Dillingh G, Bakker A, Prins J. Suicidal thoughts among medical residents  
400 with burnout. *Arch Suicide Res Off J Int Acad Suicide Res*. 2008;12(4):344–6.
- 401 8. Shanafelt TD, Balch CM, Bechamps G, Russell T, Dyrbye L, Satele D, et al. Burnout and  
402 Medical Errors Among American Surgeons. *Ann Surg*. 2010 Jun;251(6):995.
- 403 9. Dewa CS, Loong D, Bonato S, Thanh NX, Jacobs P. How does burnout affect physician  
404 productivity? A systematic literature review. *BMC Health Serv Res*. 2014 Jul 28;14:325.
- 405 10. Opoku DA, Ayisi-Boateng NK, Osarfo J, Sulemana A, Mohammed A, Spangenberg K, et al.  
406 Attrition of Nursing Professionals in Ghana: An Effect of Burnout on Intention to Quit. *Nurs*  
407 *Res Pract*. 2022;2022:3100344.
- 408 11. Robbins R, Butler M, Schoenthaler A. Provider burnout and patient-provider communication  
409 in the context of hypertension care. *Patient Educ Couns*. 2019 Aug 1;102(8):1452–9.
- 410 12. Dubale BW, Friedman LE, Chemali Z, Denninger JW, Mehta DH, Alem A, et al. Systematic  
411 review of burnout among healthcare providers in sub-Saharan Africa. *BMC Public Health*.  
412 2019 Sep 11;19:1247.
- 413 13. Dugani S, Afari H, Hirschhorn LR, Ratcliffe H, Veillard J, Martin G, et al. Prevalence and  
414 factors associated with burnout among frontline primary health care providers in low- and  
415 middle-income countries: A systematic review. *Gates Open Res*. 2018 Jun 11;2:4.

- 416 14. van der Doef M, Mbazzi FB, Verhoeven C. Job conditions, job satisfaction, somatic  
417 complaints and burnout among East African nurses. *J Clin Nurs*. 2012;21(11–12):1763–75.
- 418 15. Makuku R, Mosadeghrad AM. Health workforce retention in low-income settings: an  
419 application of the Root Stem Model. *J Public Health Policy*. 2022;43(3):445–55.
- 420 16. Anyangwe SCE, Mtonga C. Inequities in the Global Health Workforce: The Greatest  
421 Impediment to Health in Sub-Saharan Africa. *Int J Environ Res Public Health*. 2007  
422 Feb;4(2):93–100.
- 423 17. Thorsen VC, Tharp ALT, Meguid T. High rates of burnout among maternal health staff at a  
424 referral hospital in Malawi: A cross-sectional study. *BMC Nurs*. 2011 May 23;10:9.
- 425 18. Watt MH, Minja LM, Barabara M, Mlay P, Stephens MJ, Olomi G, et al. A simulation and  
426 experiential learning intervention for labor and delivery providers to address HIV stigma  
427 during childbirth in Tanzania: study protocol for the evaluation of the MAMA intervention.  
428 *BMC Pregnancy Childbirth*. 2023 Mar 16;23(1):181.
- 429 19. West CP, Dyrbye LN, Sloan JA, Shanafelt TD. Single Item Measures of Emotional  
430 Exhaustion and Depersonalization Are Useful for Assessing Burnout in Medical  
431 Professionals. *J Gen Intern Med*. 2009 Dec;24(12):1318–21.
- 432 20. Maslach C, Leiter MP. Understanding the burnout experience: recent research and its  
433 implications for psychiatry. *World Psychiatry*. 2016;15(2):103–11.
- 434 21. Dolan ED, Mohr D, Lempa M, Joos S, Fihn SD, Nelson KM, et al. Using a Single Item to  
435 Measure Burnout in Primary Care Staff: A Psychometric Evaluation. *J Gen Intern Med*. 2015  
436 May;30(5):582–7.
- 437 22. Morse J. *Critical Issues in Qualitative Research Methods*. Thousand Oaks, CA: SAGE  
438 Publications; 1994.
- 439 23. Guest G, MacQueen K, Namey E. *Applied Thematic Analysis*. Thousand Oaks, CA: SAGE  
440 Publications, Inc.; 2012.
- 441 24. Strauss A, Corbin J. *Basics of qualitative research (3rd edition): Techniques and procedures  
442 for developing grounded theory*. Thousand Oaks, California: SAGE Publications, Inc.; 2012.
- 443 25. Saunders B, Sim J, Kingstone T, Baker S, Waterfield J, Bartlam B, et al. Saturation in  
444 qualitative research: exploring its conceptualization and operationalization. *Qual Quant*.  
445 2018;52(4):1893–907.
- 446 26. Beckman HB, Wendland M, Mooney C, Krasner MS, Quill TE, Suchman AL, et al. The  
447 impact of a program in mindful communication on primary care physicians. *Acad Med J  
448 Assoc Am Med Coll*. 2012 Jun;87(6):815–9.

449 27. West CP, Dyrbye LN, Rabatin JT, Call TG, Davidson JH, Multari A, et al. Intervention to  
450 promote physician well-being, job satisfaction, and professionalism: a randomized clinical  
451 trial. *JAMA Intern Med.* 2014 Apr;174(4):527–33.

452

453 Supplemental material:

454 **S1.** Consort diagram

455 **S2.** Raw data from quantitative provider surveys at four timepoints

*Burnout is a multidimensional work-related syndrome that is characterized by 1) emotional exhaustion (feeling empty and having a hard time doing your work duties; 2) depersonalization, or having negative or distant attitudes towards others, especially your patients; and 3) Diminution of personal accomplishment, having low self—esteem or feeling like a failure.*

## Human Burnout Scale

0% burned out

100% burned out

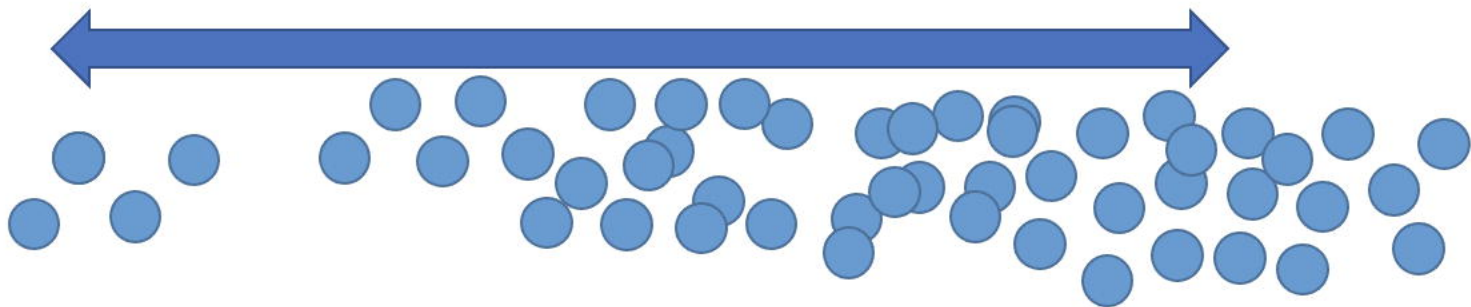

● 1 participant



# Provider Burnout Over Time

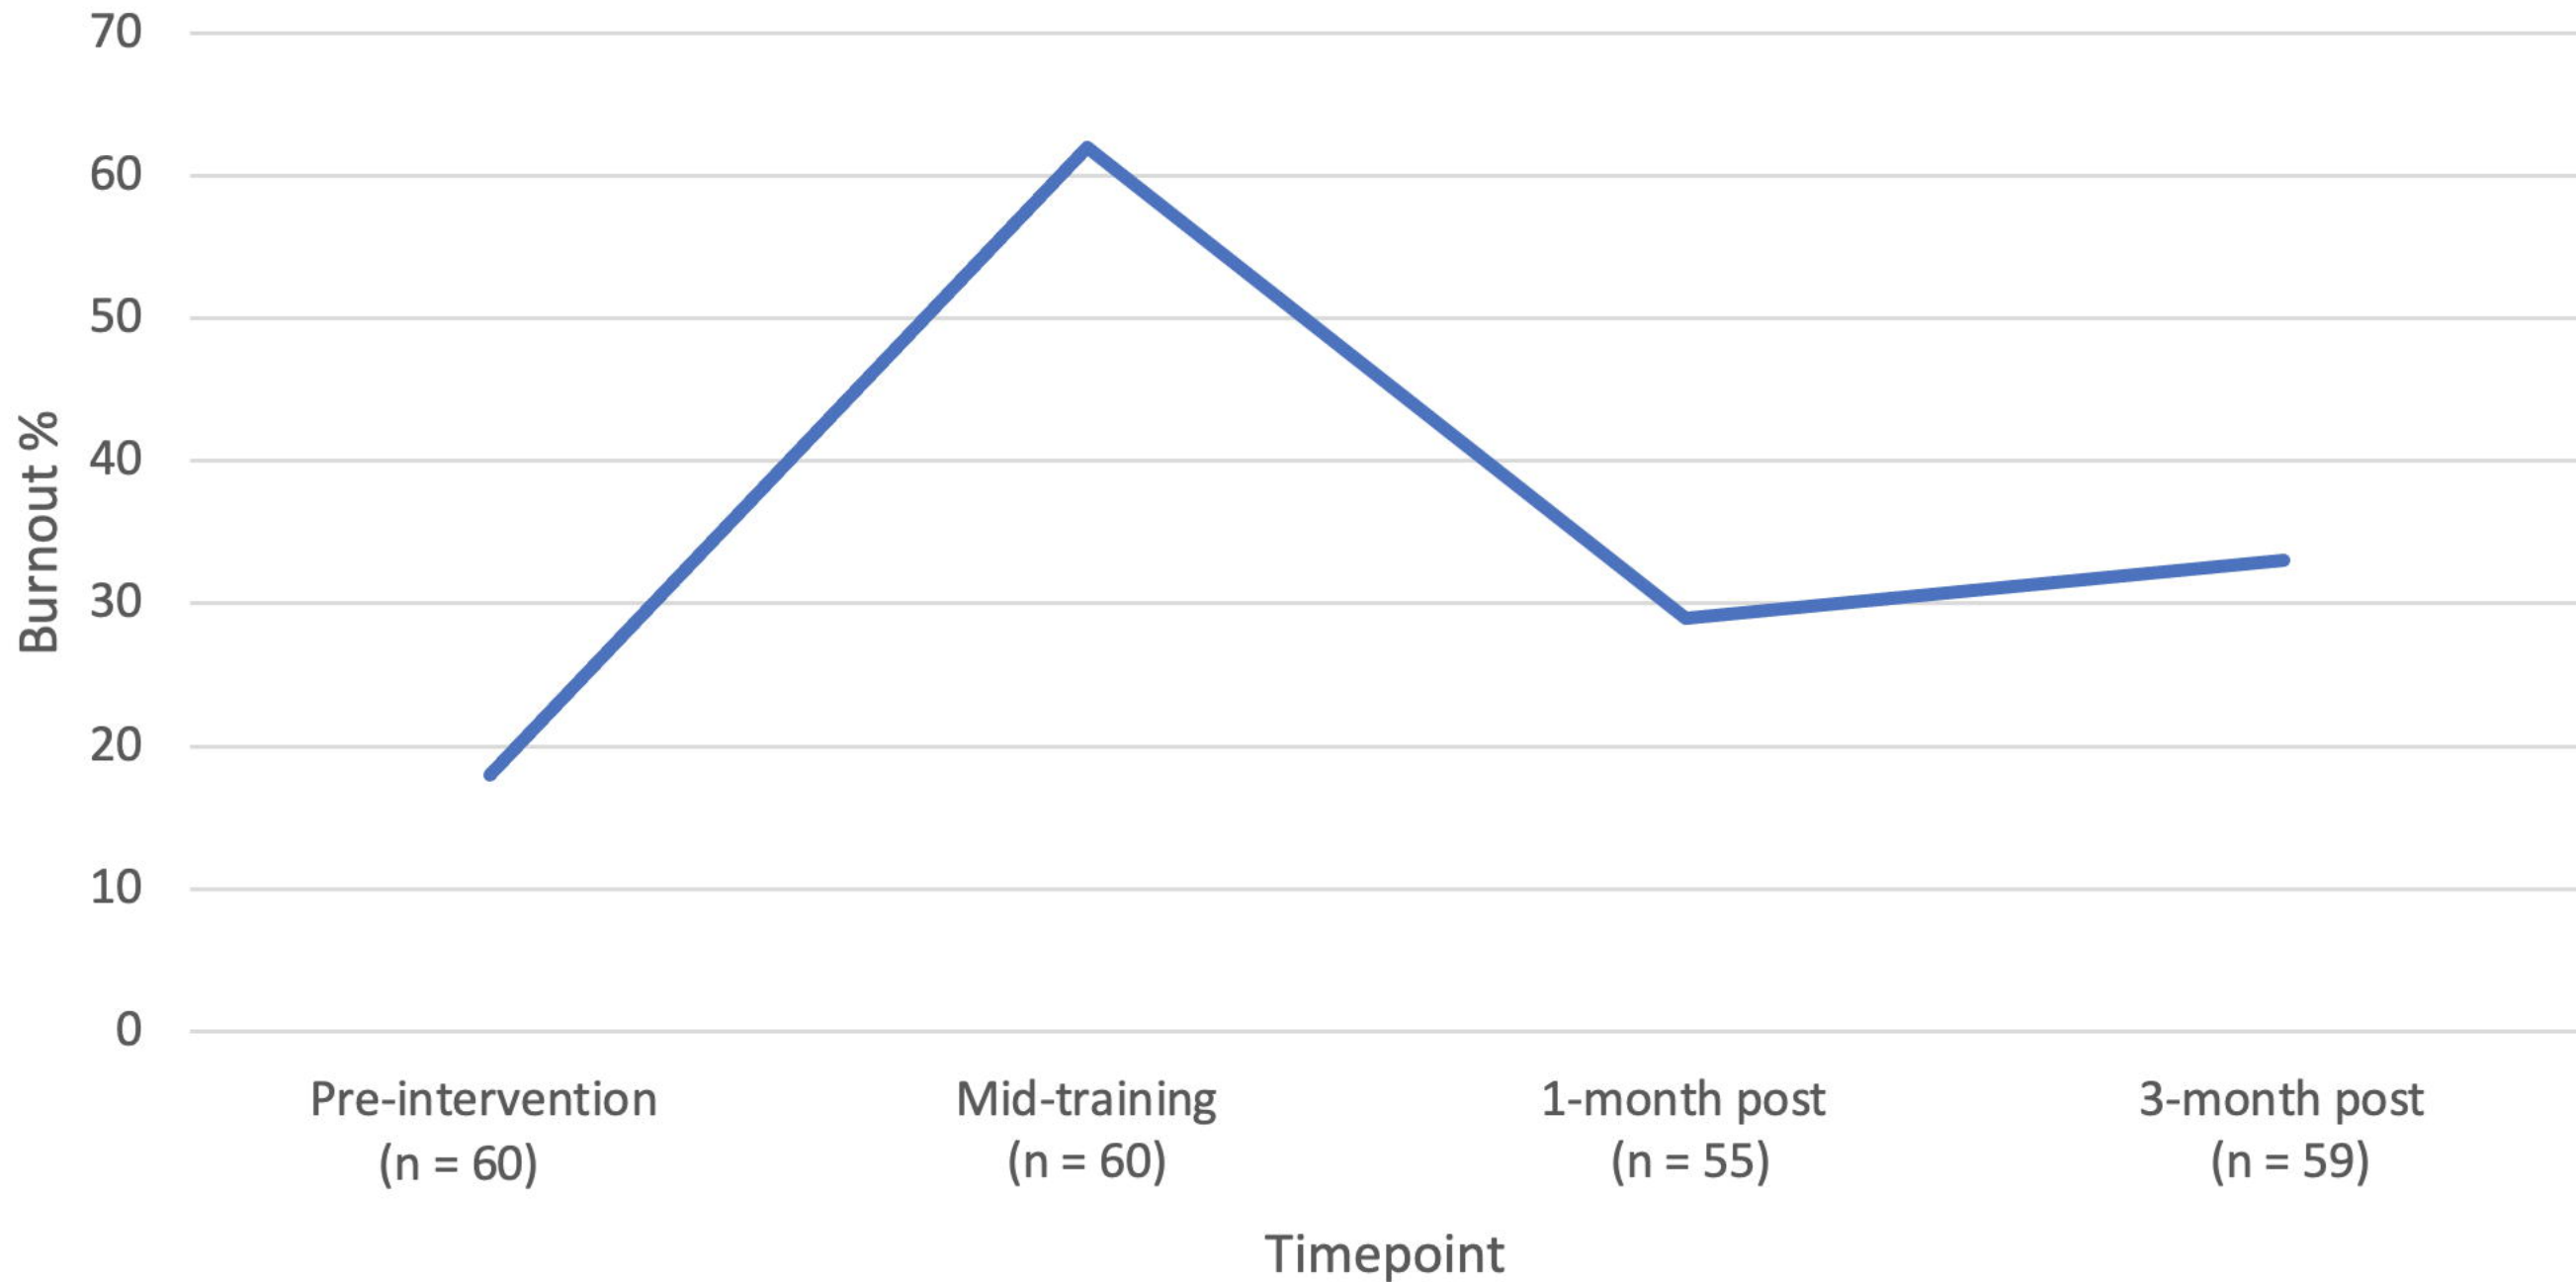

Source: https://medrxiv.org/content/10.1101/2023.05.28.23290395v1.full.pdf
